# Supplementary material for: In Vivo Screening for Secreted Proteins That Modulate Glucose Handling Identifies Interleukin-6 Family Members as Potent Hypoglycemic Agents
Source: PLoS One. 2012 Sep 4;7(9):e44600. doi: 10.1371/journal.pone.0044600 (PMC3433445; doi:10.1371/journal.pone.0044600)
Supplement: Table S1 — Mouse secreted factors tested for the ability to enhance glucose tolerance. (XLSX) [file pone.0044600.s005.xlsx]

## Sheet: Sheet1
Supporting Table 1. Mouse Secreted Factors
Gene Name	Gene Symbol	Accession Number
A disintegrin and metallopeptidase domain 15	ADAM15	BC009132.1
Adiponectin (Rat)	ADIPOQ	NM_009605.4
Androgen binding protein alpha	Abpa	NM_009596.1
Angiopoietin-like 3	ANGPTL3	NM_013913.3
Ankyrin repeat domain 27 (VPS9 domain)	ANKRD27	NM_178263.3
Anterior gradient 2 (Xenopus laevis)	AGR2	NM_011783.2
Anterior gradient homolog 3	AGR3	NM_207531.3
Apolipoprotein C-II	APOC	BC021776.1
Apolipoprotein H	APOH	NM_013475.4
Apolipoprotein N	APON	NM_133996.3
Armadillo repeat containing, X-linked 1	ARMCX1	NM_030066.3
Asialoglycoprotein receptor 1	ASGR1	NM_009714.2
ATPase, H+ transporting, lysosomal V0 subunit E	ATP6V0E	NM_025272.2
Biliverdin reductase B (flavin reductase (NADPH))	BLVRB	NM_144923.3
C-reactive protein, pentraxin-related	CRP	BC011124.1
C-type lectin domain family 4, member a2	CLEC4A2	NM_001170333.1
cAMP responsive element binding protein 3	CREB3	BC002094.1
Carbonic anhydrase 11	CAR11	NM_009800.4
Carboxylesterase 3	CES3	NM_053200.2|
Carboxylesterase 6	CES6	NM_133960.5
Carcinoembryonic antigen-related cell adhesion molecule 2	CEACAM1	NM_007543.4
Cathepsin B	CTSB	NM_007798.3
CD164 antigen	CD164	NM_016898.2
cDNA sequence BC003236	BC003236	NM_030249.4
Cell growth regulator with EF hand domain 1	CGREF1	BC023116.1
chemokine (C-C motif) ligand 22	CCL22	NM_009137.2
Chemokine (C-X-C motif) ligand 12	CXCL12	NM_021704.3
Chemokine (C-X-C motif) ligand 9	CXCL9	BC003343.1
Chitinase, acidic	CHIA	BC011134.1
Chromogranin A	CHGA	NM_007693.1
Coagulation factor II	F2	NM_010168.2
Colony stimulating factor 1 (macrophage)	CSF1	NM_001113529.1
COMM domain containing 5	COMMD5	BC025891.1
Complement component 9	C9	NM_013485.1
Cyclin D-type binding protein 1	CCNDBP1	BC005802.1
Cytochrome P450, family 2, subfamily c, polypeptide 55	CYP2C55	NM_028089.3
Cytochrome P450, family 46, subfamily a, polypeptide 1	CYP46A1	NM_010010.1
Dehydrogenase/reductase (SDR family) member 7	DHRS7	BC016189.1
DNA methyltransferase 3A	DNMT3A	BC007466.1
DNA segment, Human S2298E	D0H8S2298E	BC024492.1
Ecotropic viral integration site 2b	EVI2B	NM_146023.3
Ectonucleotide pyrophosphatase/phosphodiesterase 2	ENPP2	BC003264.1
Elastase 2A	ELA2A	NM_007919.2
Endoplasmic reticulum protein 29	ERP29	NM_026129.2
endothelial precursor protein B9	EPPB9	NM_013717.2
Ephrin A1	EFNA1	NM_010107.4
epithelial V-like antigen 1	EVA1	NM_007962.4
ERO1-like (S. cervisiae)	ERO1L	BC025102.1
eukaryotic translation initiation factor 3, subunit 1 alpha	eIF3S1	NM_144545.1
Expressed sequence AW049604	AW049604	NM_134096.2
Fibrinogen-like protein 1	FGL1	BC021946.1
Fibroblast growth factor 15	FGF15	NM_008003.2
Fibroblast growth factor 21	FGF21	NM_020013.4
Fibronectin type III domain containing 5	FNDC5	NM_027402.3
Fibulin 1	FBLN1	BC007140.1
FK506 binding protein 11	FKBP11	BC021345.1
Folate receptor 2 (fetal)	FOLR2	NM_008035.2
Folliculin	FLCN	NM_146018.1
Fucosidase, alpha-L-2, plasma	FUCA2	NM_025799.4
Gamma-glutamyl hydrolase	GGH	BC009809.1
Glucagon	GCG	NM_008100.3
Glutathione peroxidase 7	GPX7	NM_024198.3
Glypican 6	GPC6	NM_001079844.1
Golgi phosphoprotein 2	GOLPH2	BC011152.1
Gremlin 1	GREM1	NM_011824.4|
Hepcidin antimicrobial peptide 1	HAMP1	NM_032541.1
Hexosaminidase A	HEXA	NM_010421.4
Histocompatibility 2, class II, locus Mb1	H2-DMb1	BC002237.1
Huntingtin interacting protein 2	HIP2	NM_016786.3
Huntingtin interacting protein 2	HIP2	NM_016786.3
Hypothetical protein LOC100046808	LOC100046808	XM_001475864.2
Hypothetical protein LOC622404	LOC622404	NM_001037913.2
Immediate early response 3	IER3	NM_133662.2
Inhibin beta-C	INHBC	NM_010565.3
Insulin-like growth factor binding protein 6	IGFBP	NM_008344.3
Interleukin 1 receptor accessory protein	IL1RAP	NM_134103.2
Interleukin 1 receptor antagonist	IL1RN	NM_031167.5
Interleukin 17B	IL17B	NM_019508.1
Iodotyrosine deiodinase	IYD	NM_027391.3
Kallikrein 1	KLK1	NM_010639.7
Kallikrein 1-related peptidase b16	KLK1B16	NM_008454.2
Kallikrein 1-related peptidase b21	KLK1B21	NM_010642.2
Kallikrein 1-related peptidase b26	KLK1B26	NM_010644.2
Kallikrein related-peptidase 7	KLK7	NM_011872.2
Kidney androgen regulated protein	KAP	NM_010594.2
Kininogen 1	KNG1	NM_023125.3
L-amino acid oxidase 1	LAO1	BC017599.1
Ladinin	LAD1	NM_133664.3
Leprecan-like 2	LEPREL2	NM_013534.4
Leukocyte cell-derived chemotaxin 2	LECT2	BC027753.1
Linker for activation of T cells	LAT	NM_010689.2
Lipase, hepatic	LIPC	NM_008280.2
Lymphocyte antigen 6 complex, locus C	LY6C	NM_010741.3
Lysophospholipase 3	LYPLA3	NM_133792.2
macrophage migration inhibitory factor	MIF	NM_010798.2
Major urinary protein 1	MUP1	NM_001199995.1
major urinary protein 19	MUP19	NM_001135127.2
Major urinary protein 4	MUP4	NM_008648.1
mannose-binding lectin (protein C) 2	MBL2	NM_010776.1
Mannoside acetylglucosaminyltransferase 1	MGAT1	NM_001110149.1
Melanoma cell adhesion molecule	MCAM	NM_023061.2
Mesoderm development candidate 2	MESDC2	BC014742.1
Microsomal triglyceride transfer protein	MTTP	BC012686.1
Midkine	MDK	NM_010784.4
Mitochondrial ribosomal protein L14	MRPL14	NM_026732.2
Nonagouti	A	Q03288
Oligodendrocyte myelin glycoprotein	OMG	BC024757.1
Oncoprotein induced transcript 1	OIT1	NM_146050.2
Open reading frame 18	ORF18	NM_029565.3
Opioid receptor, sigma 1	OPRS1	NM_011014.2
Orosomucoid 1	ORM1	BC012725.1
Osteocalcin	BGLAP	NM_007541.2
Osteoglycin	OGN	NM_008760.4
Paraoxonase 1	PON1	BC012706.1
PDZK1 interacting protein 1	PDZK1IP1	NM_026018.3
Peptide YY	PYY	NM_145435.1
Peptidoglycan recognition protein 1	PGLYRP1	NM_009402.2
Phosphoglycerate dehydrogenase like 1	PHGDHL1	BC017635.1
Phospholipase A2, group XIIB	PLA2G12B	NM_023530.2
Placenta-specific 8	PLAC8	NM_139198.2
Protein C	PROC	NM_001042767.2
Protein-tyrosine sulfotransferase 1	TPST1	NM_013837.1
Rab6 interacting protein 1	RAB6IP1	BC022119.1
Resistin	RETNLb	NM_022984.4
Resistin-like beta (microfibrillar associated protein 4)	RETNLb	NM_023881.2
Retinol dehydrogenase 5	RDH5	NM_134006.4
RIKEN cDNA 0610006K04 gene	0610006K04Rik	BC019768.1
RIKEN cDNA 0610039D01 gene	0610039D01Rik	BC021463
RIKEN cDNA 1110018M03 gene	1110018M03Rik	NM_026271.1
RIKEN cDNA 1110035L05 gene	1110035L05Rik	BC026939.1
RIKEN cDNA 1600029D21 gene	1600029D21Rik	NM_029639.2
RIKEN cDNA 1700027N10 gene	1700027N10Rik	NM_029338.3
RIKEN cDNA 1810006K21 gene	1810006K21Rik	BC024923
RIKEN cDNA 1810031K17 gene	1810031K17Rik	NM_026977.2
RIKEN cDNA 1810045K07 gene	1810045K07Rik	NM_026432.3
RIKEN cDNA 1810045K07 gene	1810045K07Rik	NM_026432.3
RIKEN cDNA 1810057E01 gene	1810057E01Rik	NM_030749.2
RIKEN cDNA 2210010N04 gene	2210010N04Rik	BC025567
RIKEN cDNA 2210023G05 gene	2210023G05Rik	BC027185.1
RIKEN cDNA 2210407C18 gene	2210407C18Rik	BC019553.1
RIKEN cDNA 2310010G13 gene	2310010G13Rik	NM_027122.3
RIKEN cDNA 2310057J18 gene	2310057J18Rik	BC021783.1
RIKEN cDNA 2410001H17 gene	2410001H17Rik	NM_001078649.1
RIKEN cDNA 2700075B01 gene	2700075B01Rik	BC026452.1
RIKEN cDNA 4930455C21 gene	4930455C21Rik	BC002243.1
RIKEN cDNA 4933407N01 gene	4933407N01Rik	NM_025745.3
RIKEN cDNA 5730438N18 gene	5730438N18Rik	BC011293.1
RIKEN cDNA 6720467C03 gene	6720467C03Rik	BC020162.1
RIKEN cDNA 9030416H16 gene	9030416H16Rik	BC021408
RIKEN cDNA 9030416H16 gene	9030416H16Rik	BC021408
RIKEN cDNA 9430015G10 gene	9430015G10Rik	BC004010.1
RIKEN cDNA A330096I21 gene	A330096I21Rik	NM_144929.2
RIKEN cDNA C330023F11 gene	C330023F11Rik	NM_178653.3
RIKEN cDNA C730025P13 gene	C730025P13Rik	NM_177344.3
RIKEN cDNA D730039F16 gene	D730039F16Rik	BC021771.1
Ring finger protein 34	RNF34	NM_030564.1
RUN and TBC1 domain containing 3	Rutbc3	BC024122.1
Salivary protein 2	SPT2	NM_009268.1
Secreted frizzled-related protein 1	SFRP1	BC024495.1
Serine (or cysteine) peptidase inhibitor, clade A, member 1c	SERPINA1c	BC021325.1
Serine (or cysteine) peptidase inhibitor, clade A, member 3M	SERPINA3M	BC011158.1
Serine (or cysteine) peptidase inhibitor, clade A, member 3N	SERPINA3N	BC013651.1
Serine (or cysteine) peptidase inhibitor, clade B, member 5	SERPINB5	NM_009257.3
Serine carboxypeptidase 1	SCPEP1	BC004847.1
Sodium channel, nonvoltage-gated 1 gamma	SCNN1G	NM_011326.2
Somatostatin	SST	NM_009215.1
Sorbitol dehydrogenase	SORD	NM_146126.4
SPARC-like 1 (mast9, hevin)	SPARCL1	BC003759.1
Sparc/osteonectin, cwcv and kazal-like domains proteoglycan 3	SPOCK3	NM_023689.3
Sphingomyelin phosphodiesterase, acid-like 3B	SMPDL3B	NM_133888.2
Spondin 2, extracellular matrix protein	SPON2	BC017616.1
ST6 (alpha-N-acetyl-neuraminyl-2,3-beta-galactosyl-1,3)-N-acetylagalactosaminide alpha-2,6-sialytransferase 2	St6galnac2	NM_009180.3
Sushi-repeat-containing protein	SRPX	NM_016911.4
THAP domain containing 4	THAP4	BC013538.1
Tissue factor pathway inhibitor 2	TFPI2	NM_009364.3
TNF receptor superfamily, member 21, mRNA	TNFRSF21	BC016420.1
Transmembrane emp24 protein transport domain containing 9	TMED9	BC004691.1
Transmembrane protease, serine 8 (intestinal)	TMPRSS8	NM_013921.3
Trefoil factor 3, intestinal	TFF3	NM_011575.2
Tryptase gamma 1	TPSG1	BC019974.1
Tuftelin 1	TUFT1	NM_011656.2
Ubiquitin-like 3	UBL3	NM_011908.2
UDP-N-acetyl-alpha-D-galactosamine:polypeptide N-acetylgalactosaminyltransferase 11	GALNT11	NM_144908.3
Uridine-cytidine kinase 1-like 1	UCKL1	NM_026765.3
Uromodulin	UMOD	NM_009470.4
wingless related MMTV integration site 10a	WNT10A	NM_009518.2
Wnt inhibitory factor 1	WIF1	NM_011915.2
X-linked lymphocyte-regulated 4B	XLR4B	NM_021365.2
